# Supplementary material
Source: HighWire-hosted journal article supplement (https://erj.ersjournals.com/content/55/1/1901320)
Supplement: inline-supplementary-material-2 [file inline-supplementary-material-2.pdf]

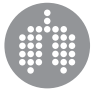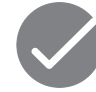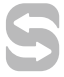

SHAREABLE PDF

# Bilateral hypoglossal nerve stimulation for treatment of adult obstructive sleep apnoea

Peter R. Eastwood<sup>1,2</sup>, Maree Barnes<sup>3,4</sup>, Stuart G. MacKay<sup>5,6,7,8</sup>, John R. Wheatley<sup>9,10,11</sup>, David R. Hillman<sup>1,2</sup>, Xuân-Lan Nguyễn<sup>12,13</sup>, Richard Lewis<sup>14,15</sup>, Matthew C. Campbell<sup>3,4</sup>, Boris Pételle<sup>16</sup>, Jennifer H. Walsh<sup>1,2</sup>, Andrew C. Jones<sup>5,6,7</sup>, Carsten E. Palme<sup>10,17</sup>, Alain Bizon<sup>18</sup>, Nicole Meslier<sup>19,20</sup>, Chloé Bertolus<sup>21,22</sup>, Kathleen J. Maddison<sup>1,2</sup>, Laurent Laccourreye<sup>18</sup>, Guillaume Raux<sup>23</sup>, Katleen Denoncin<sup>23</sup>, Valérie Attali<sup>13,21</sup>, Frédéric Gagnadou<sup>19,20</sup> and Sandrine H. Launois<sup>12,13</sup>

**Affiliations:** <sup>1</sup>Centre for Sleep Science, School of Human Sciences, University of Western Australia, Perth, Australia. <sup>2</sup>West Australian Sleep Disorders Research Institute, Sir Charles Gairdner Hospital, Perth, Australia. <sup>3</sup>Institute for Breathing and Sleep, Austin Hospital, Heidelberg, Australia. <sup>4</sup>University of Melbourne, Parkville, Australia. <sup>5</sup>Illawarra ENT Head and Neck Clinic, Wollongong, Australia. <sup>6</sup>Wollongong Hospital, Illawarra Shoalhaven Local Health District (ISLHD), Wollongong, Australia. <sup>7</sup>Graduate School of Medicine, University of Wollongong, Wollongong, Australia. <sup>8</sup>Woolcock Institute of Medical Research, Glebe, Australia. <sup>9</sup>Dept of Respiratory and Sleep Medicine, Westmead Hospital, Westmead, Australia. <sup>10</sup>University of Sydney at Westmead Hospital, Westmead, Australia. <sup>11</sup>Ludwig Engel Centre for Respiratory Research, The Westmead Institute for Medical Research, Westmead, Australia. <sup>12</sup>Unité de Somnologie et Fonction Respiratoire, Hôpital St Antoine, Paris, France. <sup>13</sup>Sorbonne Université, INSERM, UMR1158 Neurophysiologie Respiratoire Expérimentale et Clinique, Paris, France. <sup>14</sup>Dept Otolaryngology, Head and Neck Surgery, Royal Perth Hospital, Perth, Australia. <sup>15</sup>Hollywood Private Hospital, Perth, Australia. <sup>16</sup>Service ORL Chirurgie de la Face et du Cou, Hôpital Tenon, AP-HP, Paris, Sorbonne Université, Paris, France. <sup>17</sup>The Dept of Otolaryngology Head Neck Surgery, Westmead Hospital, Westmead, Australia. <sup>18</sup>Dept Otolaryngology, Head and Neck Surgery, University Hospital of Angers, Angers, France. <sup>19</sup>Dept of Respiratory and Sleep Medicine, University Hospital of Angers, Angers, France. <sup>20</sup>INSERM UMR 1063 "SOPAM", University of Angers, Angers, France. <sup>21</sup>AP-HP, Groupe Hospitalier Pitié-Salpêtrière Charles Foix, Service des Pathologies du Sommeil (Département "R3S"), Paris, France. <sup>22</sup>AP-HP, Groupe Hospitalier Pitié-Salpêtrière Charles Foix, Service de Stomatologie et Chirurgie Maxillo-faciale, Paris, France. <sup>23</sup>Nyxoah, S.A., Mont-Saint-Guibert, Belgium.

**Correspondence:** Peter R. Eastwood, Centre for Sleep Science, School of Human Sciences, University of Western Australia, Crawley, Western Australia 6009, Australia. E-mail: peter.eastwood@health.wa.gov.au

@ERSpublications

**A new method of hypoglossal nerve stimulation to treat sleep apnoea does so bilaterally via an implanted neurostimulator activated externally. Its simplicity and relative non-invasiveness have not compromised its effectiveness relative to older methods.** <http://bit.ly/2IDCeif>

**Cite this article as:** Eastwood PR, Barnes M, MacKay SG, *et al.* Bilateral hypoglossal nerve stimulation for treatment of adult obstructive sleep apnoea. *Eur Respir J* 2020; 55: 1901320 [<https://doi.org/10.1183/13993003.01320-2019>].

This single-page version can be shared freely online.

## ABSTRACT

**Background and aim:** Hypoglossal nerve stimulation (HNS) decreases obstructive sleep apnoea (OSA) severity *via* genioglossus muscle activation and decreased upper airway collapsibility. This study assessed the safety and effectiveness at 6 months post-implantation of a novel device delivering bilateral HNS *via* a small implanted electrode activated by a unit worn externally, to treat OSA: the Genio™ system.

**Methods:** This prospective, open-label, non-randomised, single-arm treatment study was conducted at eight centres in three countries (Australia, France and the UK). Primary outcomes were incidence of device-related serious adverse events and change in the apnoea–hypopnoea index (AHI). The secondary outcome was the change in the 4% oxygen desaturation index (ODI). Additional outcomes included measures of sleepiness, quality of life, snoring and device use. This trial was registered with ClinicalTrials.gov, number NCT03048604.

**Results:** 22 out of 27 implanted participants (63% male, aged  $55.9 \pm 12.0$  years, body mass index (BMI)  $27.4 \pm 3.0 \text{ kg}\cdot\text{m}^{-2}$ ) completed the protocol. At 6 months BMI was unchanged ( $p=0.85$ ); AHI decreased from  $23.7 \pm 12.2$  to  $12.9 \pm 10.1 \text{ events}\cdot\text{h}^{-1}$ , a mean change of  $10.8 \text{ events}\cdot\text{h}^{-1}$  ( $p<0.001$ ); and ODI decreased from  $19.1 \pm 11.2$  to  $9.8 \pm 6.9 \text{ events}\cdot\text{h}^{-1}$ , a mean change of  $9.3 \text{ events}\cdot\text{h}^{-1}$  ( $p<0.001$ ). Daytime sleepiness (Epworth Sleepiness Scale;  $p=0.01$ ) and sleep-related quality of life (Functional Outcomes of Sleep Questionnaire-10;  $p=0.02$ ) both improved significantly. The number of bed partners reporting loud, very intense snoring, or leaving the bedroom due to participant snoring decreased from 96% to 35%. 91% of participants reported device use  $>5$  days per week, and 77% reported use for  $>5$  h per night. No device-related serious adverse events occurred during the 6-month post-implantation period.

**Conclusions:** Bilateral HNS using the Genio™ system reduces OSA severity and improves quality of life without device-related complications. The results are comparable with previously published HNS systems despite minimal implanted components and a simple stimulation algorithm.
